# Supplementary material for: Activatable endoplasmic reticulum-targeted NIR fluorescent probe with a large Stokes shift for detecting and imaging chymotrypsin
Source: Royal Society of Chemistry journal article supplement (doi:10.1039/d2an01013e), 2022-01-01
Supplement: d2an01013e1.pdf [file d2an01013e1.pdf]

## Supporting Information

### Activatable endoplasmic reticulum-targeted NIR fluorescent probe with large Stokes shift for detecting and imaging of chymotrypsin

Ting Lan, Qing-qin Tian, Ming-hua Li, Wei He\*

Department of Chemistry, School of Pharmacy, The Fourth Military Medical University, 169 Changle West Road, Xi'an, 710032, P.R. China

\*E-mail: [weihechem@fmmu.edu.cn](mailto:weihechem@fmmu.edu.cn)

#### Contents

|                                                     |   |
|-----------------------------------------------------|---|
| 1. Experimental Section .....                       | 2 |
| 2. Spectral Data of Probe ISO-OH.....               | 3 |
| 3. Response Mechanism of Probe ISO-Chy to CHT ..... | 4 |
| 4. In <i>vitro</i> cytotoxicity of ISO-Chy.....     | 5 |
| 5. Characterization of compounds .....              | 5 |

## 1. Experimental Section

### Synthesis and Characterization of ISO-OH

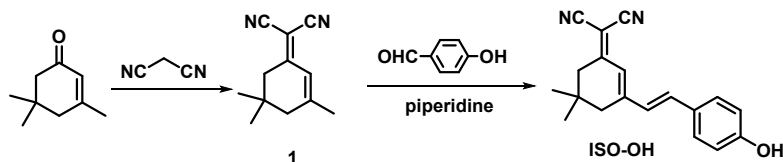

Fig. 1 Synthesis of ISO-OH

**Synthesis of Compound 1.** Isophorone (500 mg, 3.62 mmol), malononitrile (240 mg, 3.62 mmol) and sodium acetate trihydrate (200 mg, 136 mmol) were added to 10 mL of anhydrous ethanol. The mixture was stirred at 50 °C for 24 h. After cooling to room temperature, the solvent was removed by rotary evaporation. Then, the crude product was purified by silica gel column chromatography (PE: EA = 5: 1) to obtain Compound 1 as white crystals (322.9 mg, yield 48%). <sup>1</sup>H NMR (400 MHz, CDCl<sub>3</sub>) δ 6.63 (s, 1H), 2.52 (s, 2H), 2.19 (s, 2H), 2.04 (s, 3H), 1.02 (s, 6H).

**Synthesis of Compound ISO-OH.** Compound 1 (400 mg, 2 mmol) and 4-hydroxybenzaldehyde (400 mg, 3 mmol) were dissolved in anhydrous ethanol (10 mL), and then piperidine (60 μL) was added. The mixture was refluxed for 4 h. After that, the solvent was removed by rotary evaporation to obtain the crude product. The crude product was purified by silica gel column chromatography (PE: EA = 3: 1) to yield ISO-OH as an orange solid (540.4 mg, 93% yield). <sup>1</sup>H NMR (400 MHz, DMSO-d<sub>6</sub>) δ 9.99 (s, 1H), 7.56 (d, *J* = 8.0 Hz, 2H), 7.21 (d, *J* = 4.0 Hz, 2H), 6.85–6.75 (m, 3H), 2.60 (s, 2H), 2.53 (s, 2H), 1.01 (s, 6H).

## 2. Spectral Data of Probe ISO-Chy

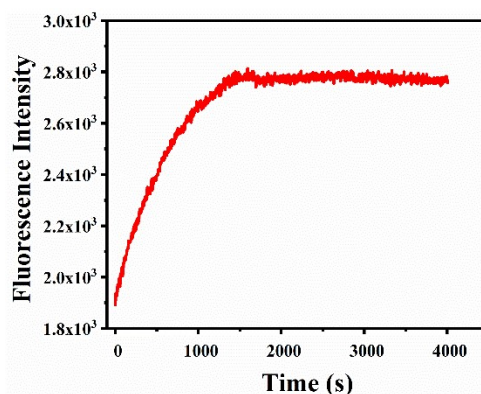

**Fig. S2** Time-dependent fluorescence response of ISO-Chy (10 mM) upon addition of CHT (2  $\mu\text{g}\cdot\text{mL}^{-1}$ ). Conditions: DMSO/PBS (v/v=3/7, pH=7.4),  $\lambda_{\text{ex}}$ =540 nm,  $\lambda_{\text{em}}$ =675 nm, slit: 2 nm/2 nm.

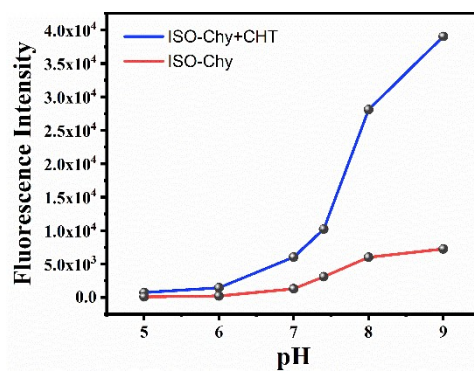

**Fig. S3** Effects of pH on the fluorescence intensity of ISO-Chy (10  $\mu\text{M}$ ) in the presence of CHT (10  $\mu\text{g}\cdot\text{mL}^{-1}$ ).

### 3. Response Mechanism of Probe ISO-Chy to CHT

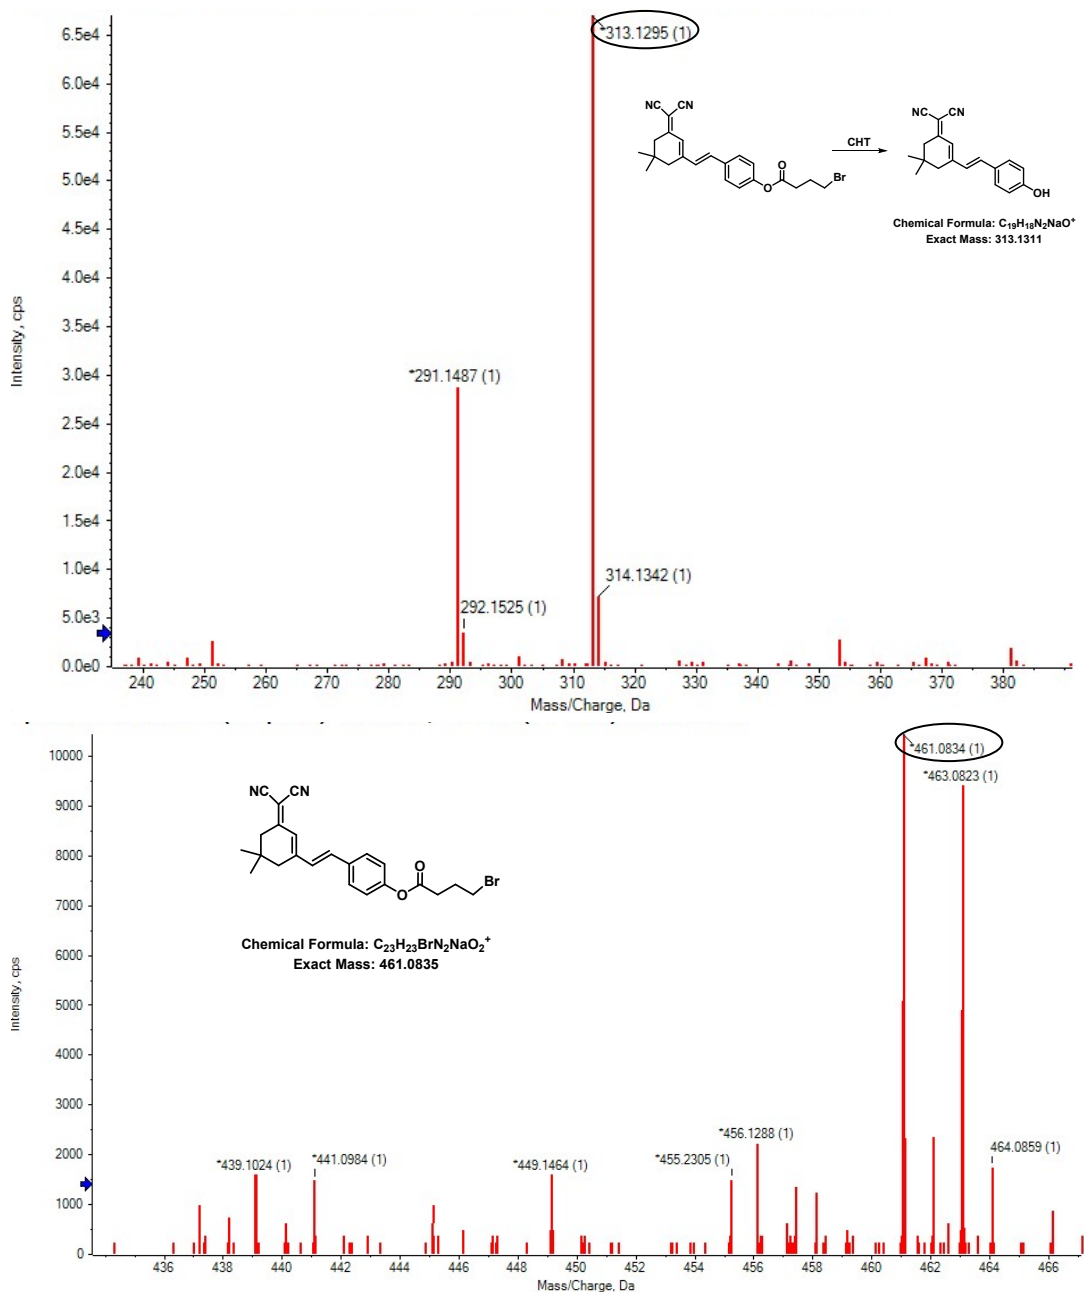

**Fig. S4** HRMS spectrum of ISO-Chy with and without the addition of CHT

## 4. *In vitro* cytotoxicity of ISO-Chy

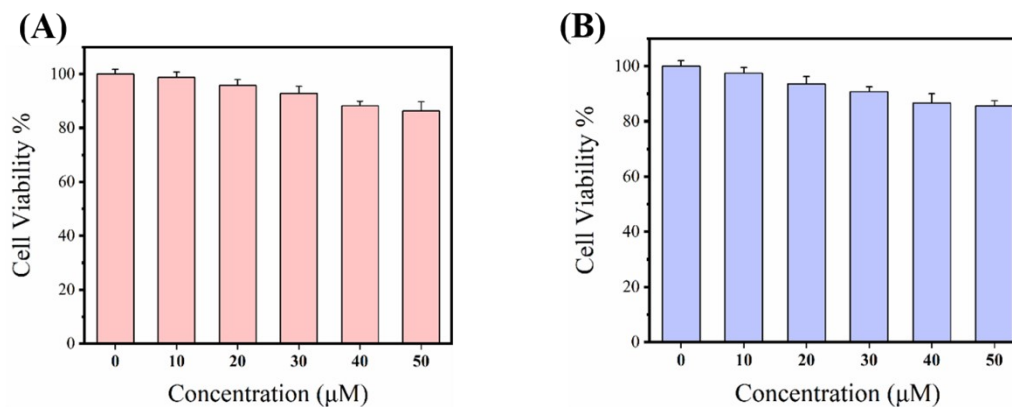

**Fig. S5** Cell viability values (%) estimated by MTT proliferation test versus concentrations of ISO-Chy. (A) HepG2 cells and (B) P815 cells were cultured in the presence of 0-50 μM ISO-Chy.

## 5. Characterization of compounds

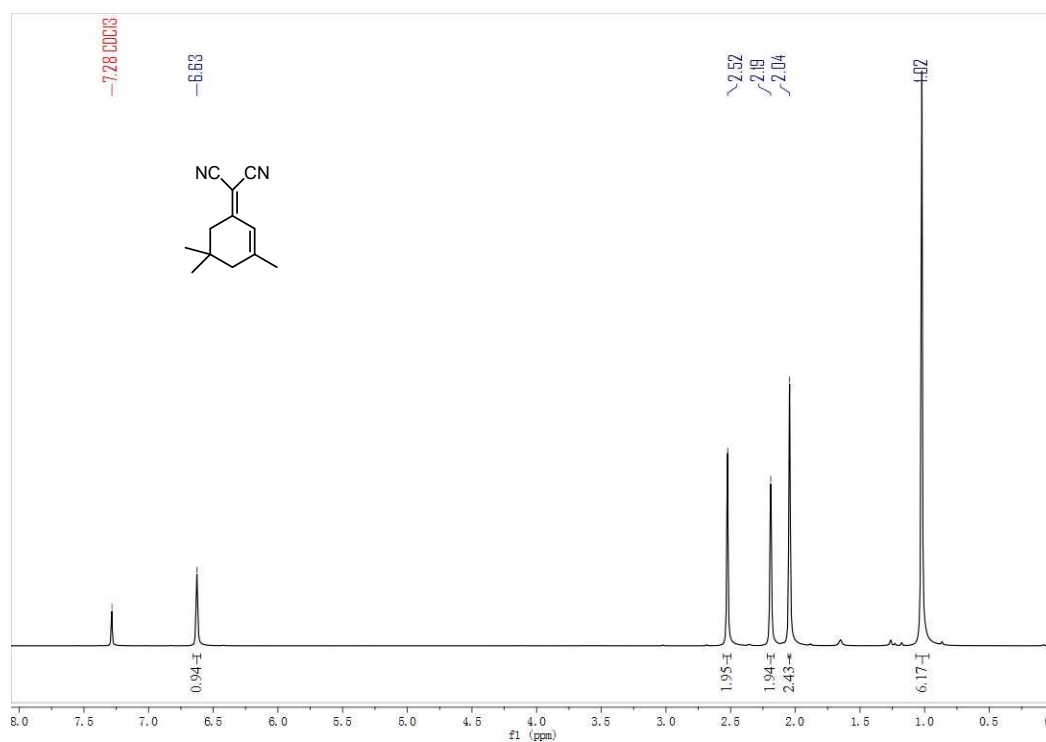

**Fig. S5** <sup>1</sup>H NMR spectrum of compound 1 in CDCl<sub>3</sub>

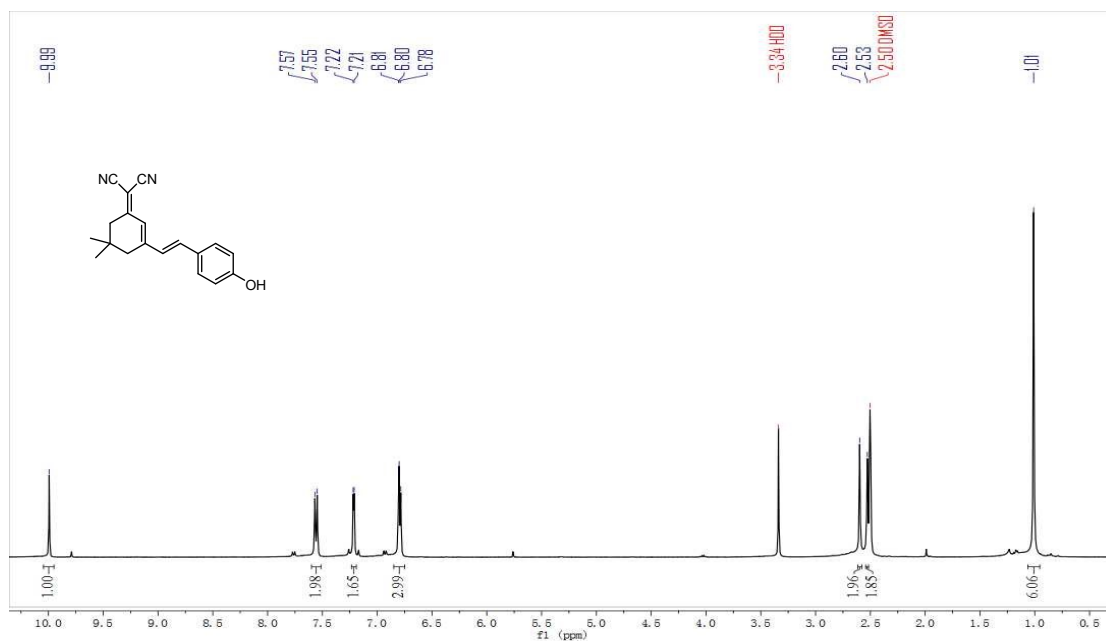

**Fig. S6**  $^1\text{H}$  NMR spectrum of compound ISO-Chy in  $\text{DMSO-}d_6$

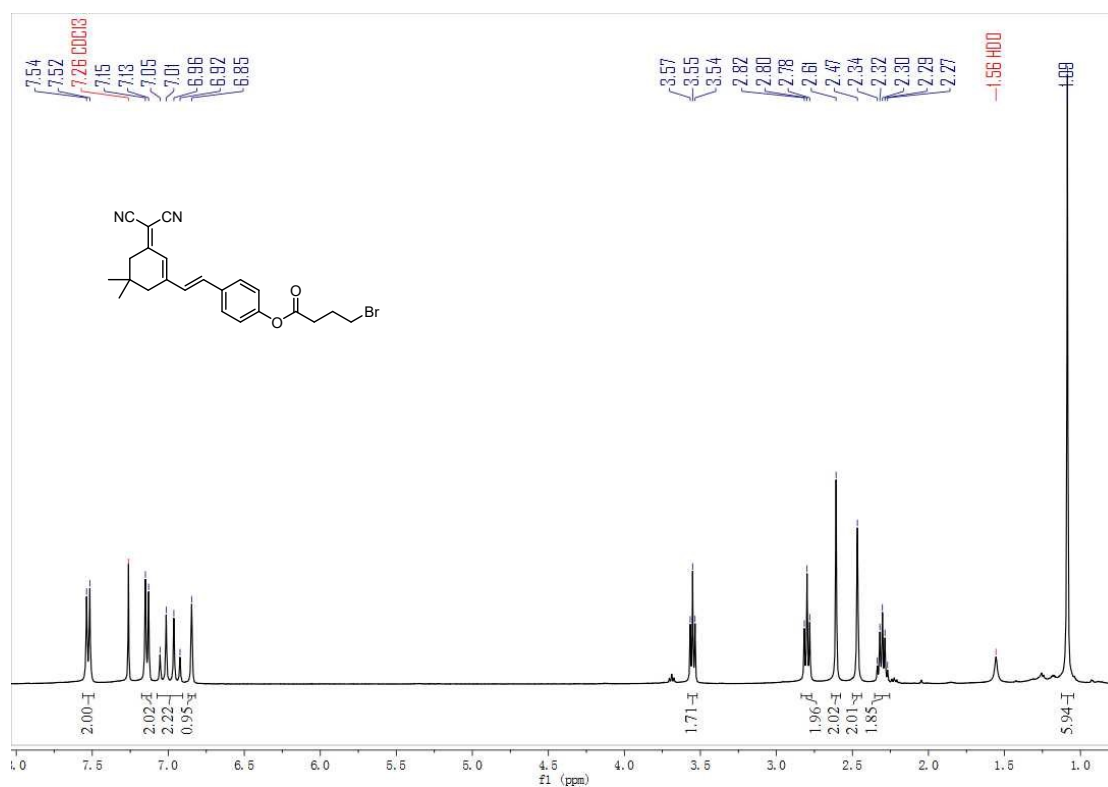

**Fig. S7**  $^1\text{H}$  NMR spectrum of ISO-Chy in  $\text{CDCl}_3$

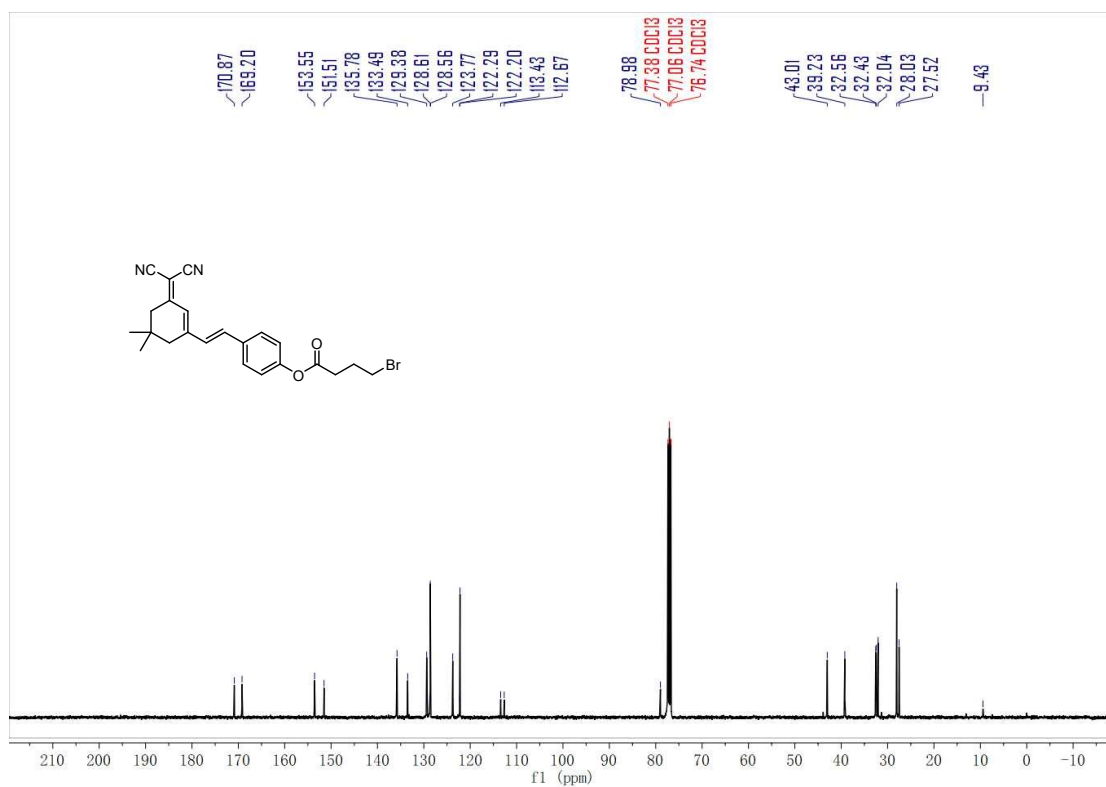

**Fig. S8**  $^{13}\text{C}$  NMR spectrum of ISO-Chy in  $\text{CDCl}_3$

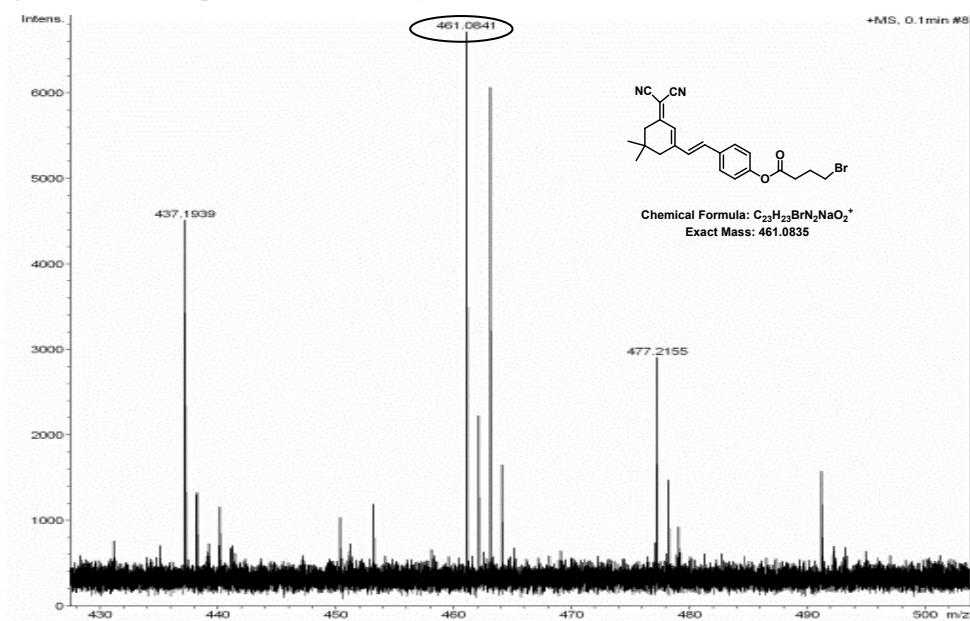

**Fig. S9** HRMS spectrum of ISO-Chy
